# Supplementary material for: Flexible “piperazine–pyrazine” building blocks: conformational isomerism of “equatorial–axial” sites toward the constructions of silver(i) coordination chains
Source: Royal Society of Chemistry journal article supplement (doi:10.1039/c001735c), 2010-01-01
Supplement: c001735c.pdf [file c001735c.pdf]

## Supplementary Information for

### Flexible “piperazine-pyrazine” building blocks: conformational isomerism of “equatorial-axial” sites toward the constructions of silver(I) coordination chains

Shu-Chun Hsu,<sup>a,b</sup> Jing-Yun Wu,<sup>a</sup> Chin-Fen Lee,<sup>a,b</sup> Chung-Chou Lee,<sup>a</sup> Long-Li Lai<sup>\*b</sup> and  
Kuang-Lieh Lu<sup>\*a</sup>

<sup>a</sup>*Institute of Chemistry, Academia Sinica, Taipei 115, Taiwan and* <sup>b</sup>*Department of Applied Chemistry, National Chi Nan University, Nantou 545, Taiwan*

#### Experimental Section

**General Remarks.** All reagents were purchased commercially and were used as received without further purification. <sup>1</sup>H NMR spectra were recorded on a Bruker AMX-400 FT-NMR spectrometer. FAB-MS data were obtained using a JMS-700 double focusing mass spectrometer. Thermogravimetric analysis (TGA) was performed under nitrogen with a Perkin-Elmer TGA-7 TG analyzer. Elemental analyses were conducted on a Perkin-Elmer 2400 CHN elemental analyzer. X-ray powder diffraction (XRPD) data were recorded on a Siemens D5000 diffractometer at 40 kV, 30 mA for Cu K $\alpha$  ( $\lambda = 1.5406$  Å), with a step size of 0.02° in  $\theta$  and a scan speed of 1 s per step size. Infrared spectra were recorded on a Perkin-Elmer Paragon 1000 FT-IR spectrometer.

**Synthesis of *N,N'*-Bis(2-pyrazinyl)piperazine (bpzp).** To a solution of piperazine (866 mg, 10 mmol) in ethanol (10 mL), triethylamine (NEt<sub>3</sub>, 3.5 mL, 25 mmol) and 2-chloropyrazine (2.3 mL, 25 mmol) were added at room temperature, and the reaction mixture was stirred 48 h at 140 °C. After cooling to room temperature, the solution was treated with saturated aqueous of K<sub>2</sub>CO<sub>3</sub>. After filtered and washed with distilled water for several times, the deep-yellow precipitate was recrystallized from CH<sub>2</sub>Cl<sub>2</sub> and *n*-hexane to yield bpzp as yellow crystals. Yield: 77% (1863 mg, 7.7 mmol). <sup>1</sup>H NMR (400 MHz, CHCl<sub>3</sub>-*d*, δ): 8.16 (d, *J* = 1.3 Hz, 2H), 8.08 (dd, *J* = 1.5, 1.0 Hz, 2H), 7.88 (d, *J* = 2.6 Hz, 2H), 3.74 (s, 4H) ppm. FAB-MS (*m/z*): 243 [M+H]<sup>+</sup>. Anal. Calcd for C<sub>12</sub>H<sub>14</sub>N<sub>6</sub>: C, 59.49; H, 5.82; N, 34.69. Found: C, 59.38; H, 5.89; N, 34.69. IR (cm<sup>-1</sup>, KBr, ν): 3078, 3045, 2995, 2919, 2891, 2853, 1578, 1523, 1485, 1430, 1375, 1315, 1271, 1249, 1200, 1173, 1140, 1078, 1036, 998, 965, 839, 779, 751, 669, 620, 533, 445, 417.

**Synthesis of {[Ag(bpzp)](PF<sub>6</sub>)}<sub>n</sub> (1).** A solution of AgPF<sub>6</sub> (126 mg, 5.0 × 10<sup>-1</sup> mmol) in MeOH (5 mL) was carefully layered on top of THF (10 mL, middle), and a solution of bpzp (121 mg, 5.0 × 10<sup>-1</sup> mmol) in CH<sub>2</sub>Cl<sub>2</sub> (5 mL, bottom) at room temperature. The solution was allowed to stand for approximately three week, resulting in the formation of yellow-colored crystals of **1**. Yield: 36% (89.0 mg, 1.8 × 10<sup>-1</sup> mmol). Anal. Calcd for C<sub>12</sub>H<sub>14</sub>AgF<sub>6</sub>N<sub>6</sub>P: C, 29.11; H, 2.85; N, 16.97. Found: C, 29.21; H, 2.96; N, 16.78. IR (cm<sup>-1</sup>, KBr, ν): 3116, 3083, 2919, 2848, 1589, 1523, 1490, 1436, 1392, 1365, 1315, 1271, 1244, 1205, 1173, 1145, 1124, 1085, 1036, 992, 960, 844, 659, 620, 550, 489, 423.

**Synthesis of {[Ag(bpzp)](SbF<sub>6</sub>)}<sub>n</sub> (2).** A solution of AgSbF<sub>6</sub> (68.7 mg, 2.0 × 10<sup>-1</sup> mmol) in MeOH (5 mL) was carefully layered on top of THF (10 mL, middle), and a solution of bpzp (48.5 mg, 2.0 × 10<sup>-1</sup> mmol) in CH<sub>2</sub>Cl<sub>2</sub> (5 mL, bottom) at room temperature. The solution was allowed to stand for approximately one week, resulting in the formation of yellow-colored crystals of **2**. Yield: 55% (62.2 mg, 1.1 × 10<sup>-1</sup> mmol). Anal. Calcd for C<sub>12</sub>H<sub>14</sub>AgF<sub>6</sub>N<sub>6</sub>Sb: C, 24.60; H, 2.41; N, 14.34. Found: C, 24.81;

H, 2.57; N, 13.89. IR (cm<sup>-1</sup>, KBr,  $\nu$ ): 3116, 3083, 2919, 2853, 1584, 1518, 1490, 1387, 1359, 1315, 1271, 1244, 1200, 1173, 1140, 1085, 1036, 998, 954, 828, 773, 746, 664, 642, 615, 549, 483, 423.

**Synthesis of {[Ag(bpzp)](ClO<sub>4</sub>)}<sub>n</sub> (3).** A solution of AgClO<sub>4</sub>·xH<sub>2</sub>O (42.2 mg, 2.0 × 10<sup>-1</sup> mmol) in MeOH (5 mL) was carefully layered on top of THF (10 mL, middle), and a solution of bpzp (48.5 mg, 2.0 × 10<sup>-1</sup> mmol) in CH<sub>2</sub>Cl<sub>2</sub> (5 mL, bottom) at room temperature. The solution was allowed to stand for approximately one week, resulting in the formation of yellow-colored crystals of **3**. Yield: 75% (66.1 mg, 1.5 × 10<sup>-1</sup> mmol). Anal. Calcd for C<sub>12</sub>H<sub>14</sub>AgClN<sub>6</sub>O<sub>4</sub>: C, 32.06; H, 3.14; N, 18.69. Found: C, 32.21; H, 3.36; N, 18.35. IR (cm<sup>-1</sup>, KBr,  $\nu$ ): 3105, 3083, 2925, 2886, 2853, 1584, 1518, 1485, 1447, 1430, 1370, 1315, 1271, 1249, 1217, 1145, 1107, 1085, 1069, 998, 834, 620, 549, 429.

**Synthesis of {[Ag(bpzp)](NO<sub>3</sub>)}<sub>n</sub> (4).** A solution of AgNO<sub>3</sub> (17.9 mg, 1.0 × 10<sup>-1</sup> mmol) in MeOH (5 mL) was carefully layered on top of THF (10 mL, middle), and a solution of bpzp (24.6 mg, 1.0 × 10<sup>-1</sup> mmol) in CH<sub>2</sub>Cl<sub>2</sub> (5 mL, bottom) at room temperature. The solution was allowed to stand for approximately one week, resulting in the formation of yellow-colored plate-shaped crystals of **4**. Yield: 86% (35.6 mg, 8.6 × 10<sup>-2</sup> mmol). Anal. Calcd for C<sub>12</sub>H<sub>14</sub>AgN<sub>7</sub>O<sub>3</sub>: C, 34.97; H, 3.42; N, 23.79. Found: C, 34.59; H, 3.53; N, 23.97. IR (cm<sup>-1</sup>, KBr,  $\nu$ ): 3098, 3078, 2976, 2893, 2856, 1584, 1520, 1485, 1452, 1428, 1384, 1314, 1269, 1246, 1196, 1142, 1084, 1043, 1004, 980, 946, 847, 777, 750, 669, 640, 547.

**Crystal Structure Determination.** Single-crystal X-ray diffraction was performed by using a Nonius Kappa CCD diffractometer for **1–3** and a Bruker Smart CCD diffractometer for **4**, equipped with graphite monochromatized Mo K $\alpha$  radiation ( $\lambda = 0.71073$  Å). Intensity data were collected at 200(2) K within the limits of 2.66° ≤  $\theta$  ≤ 25.34° for **1**, 2.60° ≤  $\theta$  ≤ 25.37° for **2**, and 2.22° ≤  $\theta$  ≤ 25.36° for **3**, and at 293(2) K within the limits of 2.55° ≤  $\theta$  ≤ 27.48° for **4**. Starting models for structure refinement were found using direct methods (SIR92<sup>S1</sup> for **1**, SHELXS-86<sup>S2</sup> for **2** and **3**, and SHELXS-97<sup>S3</sup> for **4**), and the structural data were refined by full-matrix least-squares methods on  $F^2$  using the WINGX<sup>S4</sup> and SHELX-97<sup>S3</sup> program packages. Anisotropical thermal factors were assigned to non-hydrogen atoms.

The positions of the C–H hydrogen atoms were generated geometrically and were assigned isotropic thermal parameters.

### References

- (S1) A. Altomare, G. Cascarano, C. Giacovazzo and A. Guagliardi, *SIR92*: A program for crystal structure solution. *J. Appl. Crystallogr.*, 1993, **26**, 343.  
(S2) G. M. Sheldrick, *SHELXS-86*, Program for Crystal Structure Determination, University of Göttingen: Göttingen, Germany, 1986.  
(S3) G. M. Sheldrick, *SHELX-97* (including *SHELXS* and *SHELXL*); University of Göttingen: Göttingen, Germany, 1997.  
(S4) *WINGX*: L. J. Farrugia, *J. Appl. Crystallogr.*, 1999, **32**, 837.

**Table S1** Crystallographic data for 1–4

|                                                                                                       | 1                                                                 | 2                                                                  | 3                                                                 | 4                                                               |
|-------------------------------------------------------------------------------------------------------|-------------------------------------------------------------------|--------------------------------------------------------------------|-------------------------------------------------------------------|-----------------------------------------------------------------|
| Empirical formula                                                                                     | C <sub>12</sub> H <sub>14</sub> AgF <sub>6</sub> N <sub>6</sub> P | C <sub>12</sub> H <sub>14</sub> AgF <sub>6</sub> N <sub>6</sub> Sb | C <sub>12</sub> H <sub>14</sub> AgClN <sub>6</sub> O <sub>4</sub> | C <sub>12</sub> H <sub>14</sub> AgN <sub>7</sub> O <sub>3</sub> |
| <i>M<sub>w</sub></i>                                                                                  | 495.13                                                            | 585.91                                                             | 449.61                                                            | 412.17                                                          |
| Crystal system                                                                                        | monoclinic                                                        | monoclinic                                                         | monoclinic                                                        | monoclinic                                                      |
| Space group                                                                                           | <i>C2/c</i>                                                       | <i>C2/c</i>                                                        | <i>C2/c</i>                                                       | <i>C2/c</i>                                                     |
| <i>a</i> (Å)                                                                                          | 15.8618(4)                                                        | 15.7412(6)                                                         | 28.6770(5)                                                        | 12.595(3)                                                       |
| <i>b</i> (Å)                                                                                          | 6.4886(2)                                                         | 6.6018(2)                                                          | 13.7370(4)                                                        | 10.732(2)                                                       |
| <i>c</i> (Å)                                                                                          | 16.1829(5)                                                        | 16.5704(7)                                                         | 18.4240(4)                                                        | 10.892(2)                                                       |
| $\beta$ (deg)                                                                                         | 109.0290(10)                                                      | 109.108(2)                                                         | 123.9100(10)                                                      | 108.52(3)                                                       |
| <i>V</i> (Å <sup>3</sup> )                                                                            | 1574.54(8)                                                        | 1627.12(10)                                                        | 6023.4(2)                                                         | 1396.0(5)                                                       |
| <i>Z</i>                                                                                              | 4                                                                 | 4                                                                  | 16                                                                | 4                                                               |
| <i>T</i> (K)                                                                                          | 200(2)                                                            | 200(2)                                                             | 200(2)                                                            | 293(2)                                                          |
| $\lambda$ (Å)                                                                                         | 0.71073                                                           | 0.71073                                                            | 0.71073                                                           | 0.71073                                                         |
| <i>D<sub>calc</sub></i> (g cm <sup>-3</sup> )                                                         | 2.089                                                             | 2.392                                                              | 1.983                                                             | 1.961                                                           |
| $\mu$ (mm <sup>-1</sup> )                                                                             | 1.459                                                             | 2.939                                                              | 1.549                                                             | 1.473                                                           |
| <i>F</i> <sub>000</sub>                                                                               | 976                                                               | 1120                                                               | 3584                                                              | 824                                                             |
| GOF                                                                                                   | 1.026                                                             | 1.046                                                              | 1.037                                                             | 1.093                                                           |
| <i>R</i> <sub>1</sub> <sup>a</sup> , <i>wR</i> <sub>2</sub> <sup>b</sup> ( <i>I</i> > 2σ( <i>I</i> )) | 0.0286, 0.0691                                                    | 0.0315, 0.0756                                                     | 0.0495, 0.1153                                                    | 0.0180, 0.0462                                                  |
| <i>R</i> <sub>1</sub> <sup>a</sup> , <i>wR</i> <sub>2</sub> <sup>b</sup> (all data)                   | 0.0340, 0.0721                                                    | 0.0370, 0.0792                                                     | 0.1008, 0.1541                                                    | 0.0195, 0.0465                                                  |
| $\Delta\rho_{\max}/\Delta\rho_{\min}$ (e Å <sup>-3</sup> )                                            | 0.497/−0.507                                                      | 0.615/−1.777                                                       | 0.910/−1.033                                                      | 0.490/0.386                                                     |

$$^a R_1 = \frac{\sum \|F_o\| - |F_c|}{\sum |F_o|}, \quad ^b wR_2 = \left\{ \frac{\sum [w(F_o^2 - F_c^2)^2]}{\sum [w(F_o^2)^2]} \right\}^{1/2}.$$

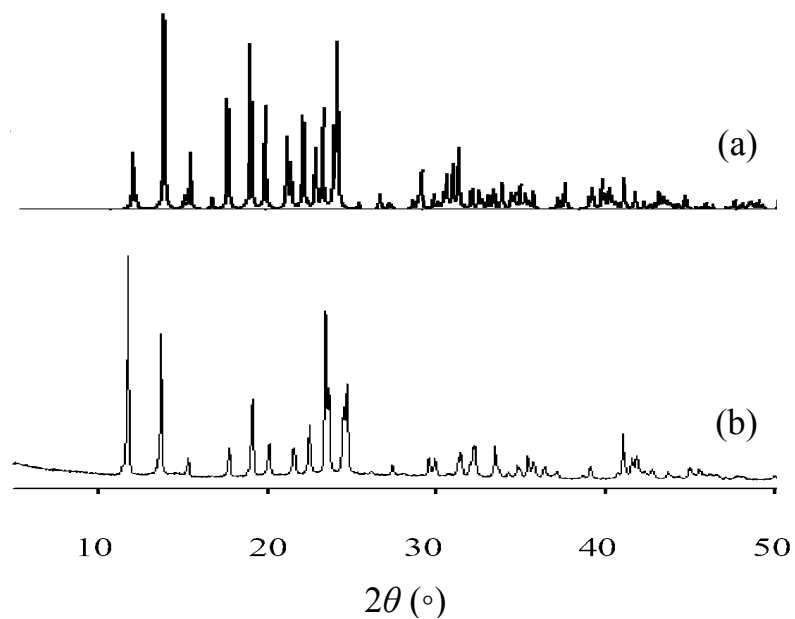

**Fig. S1** Powder X-ray diffraction (PXRD) patterns of **1**. (a) Simulated from the single-crystal data. (b) A freshly grounded sample at room temperature.

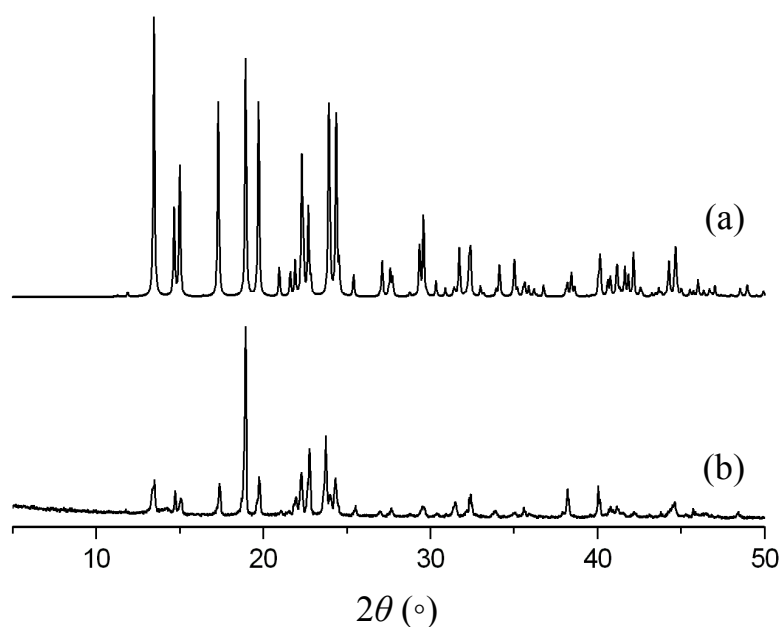

**Fig. S2** Powder X-ray diffraction (PXRD) patterns of **2**. (a) Simulated from the single-crystal data. (b) A freshly grounded sample at room temperature.

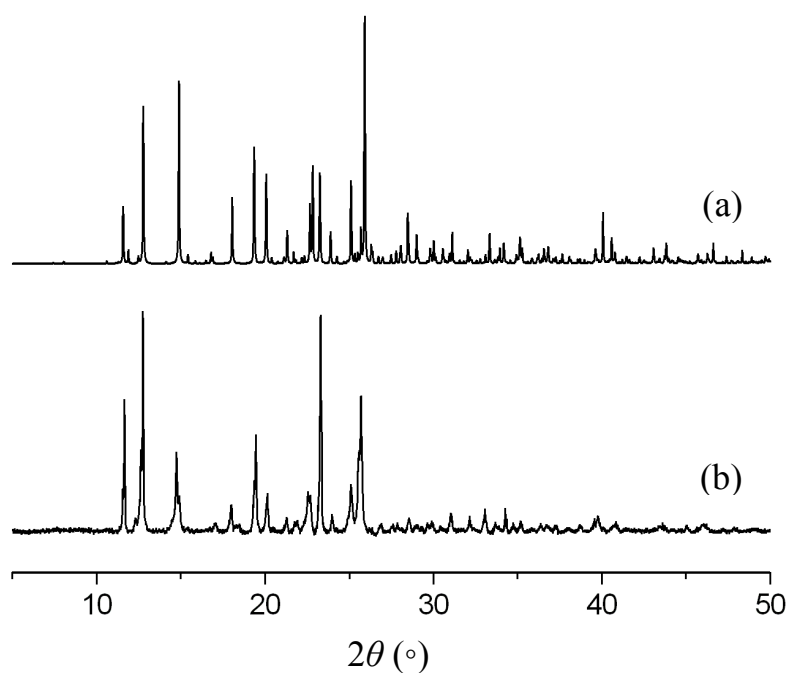

**Fig. S3** Powder X-ray diffraction (PXRD) patterns of **3**. (a) Simulated from the single-crystal data. (b) A freshly grounded sample at room temperature.

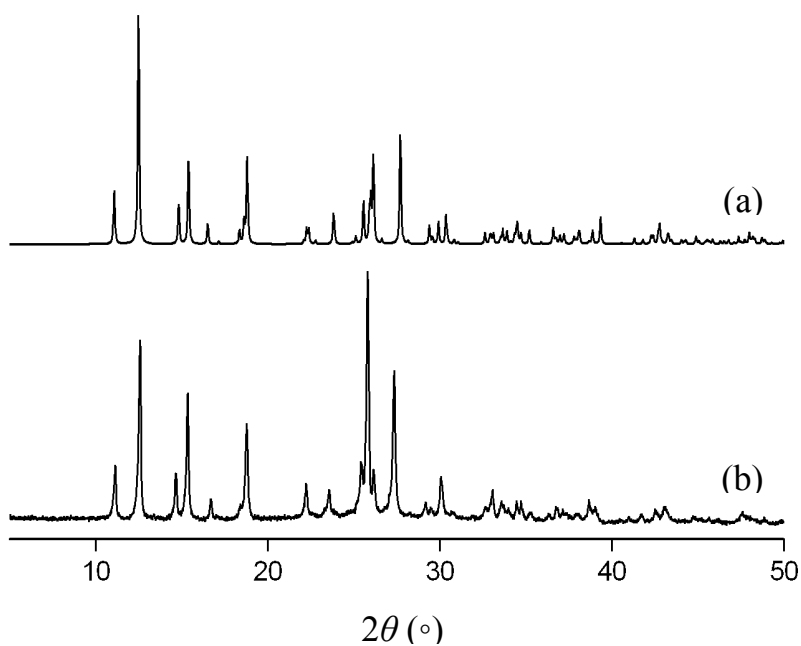

**Fig. S4** Powder X-ray diffraction (PXRD) patterns of **4**. (a) Simulated from the single-crystal data. (b) A freshly grounded sample at room temperature.

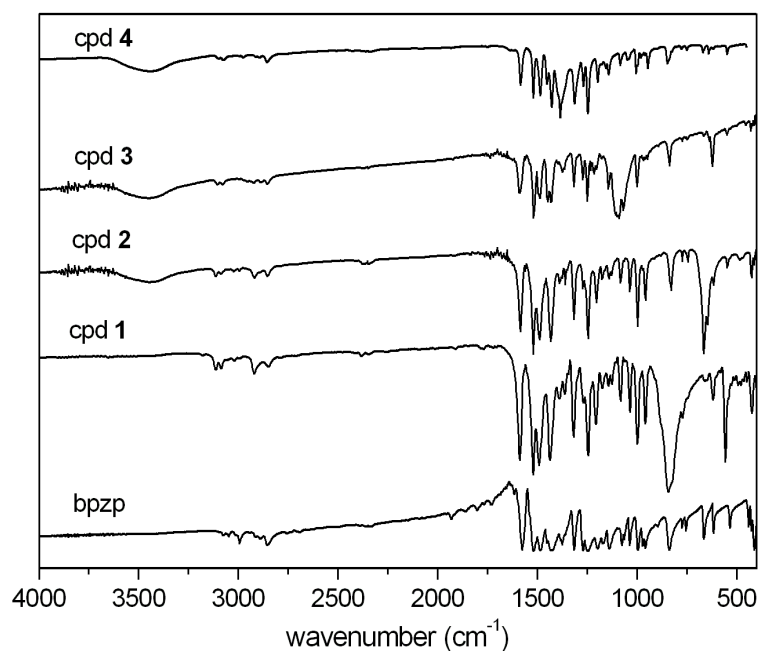

**Fig. S5** Infrared spectra of bpzp ligand and snake-like silver(I) coordination polymers 1–4.

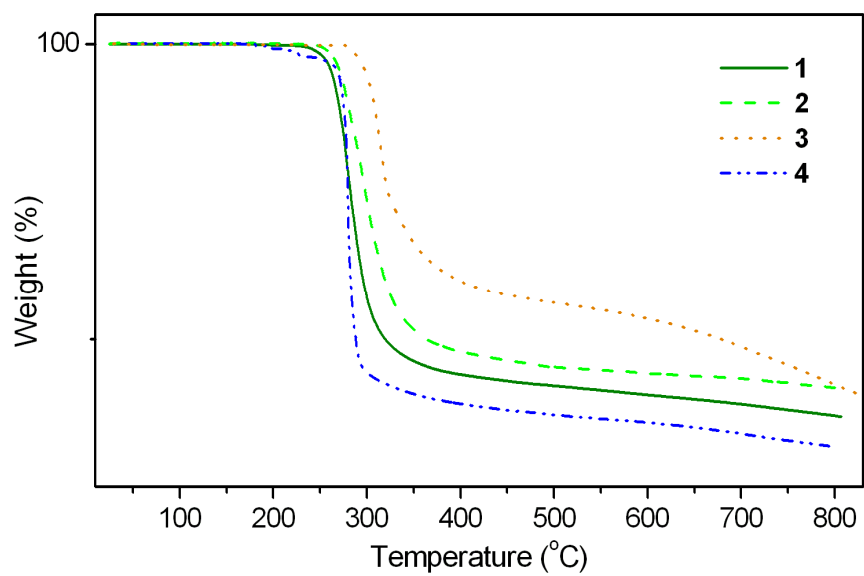

**Fig. S6** Thermogravimetric (TG) curves of 1–4.

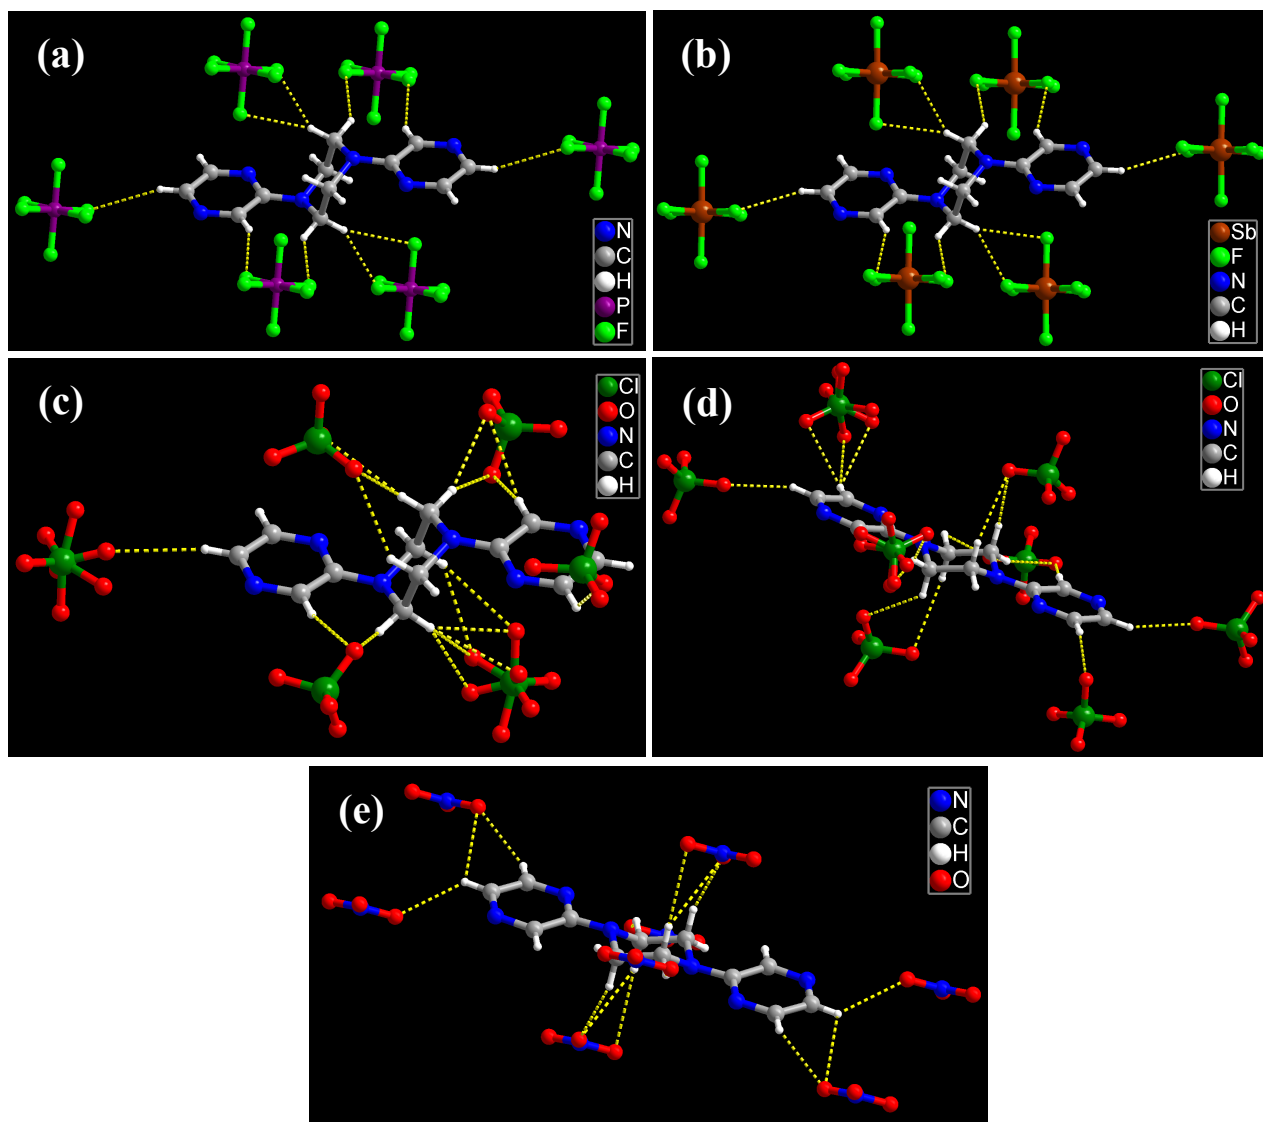

**Fig. S7** Perspective views of the nonclassical C–H···F/O hydrogen bonding interactions between the conformation-flexible bpzp ligand and anions in (a) polymer **1**, (b) polymer **2**, (c, d) polymer **3**, and (e) polymer **4**.



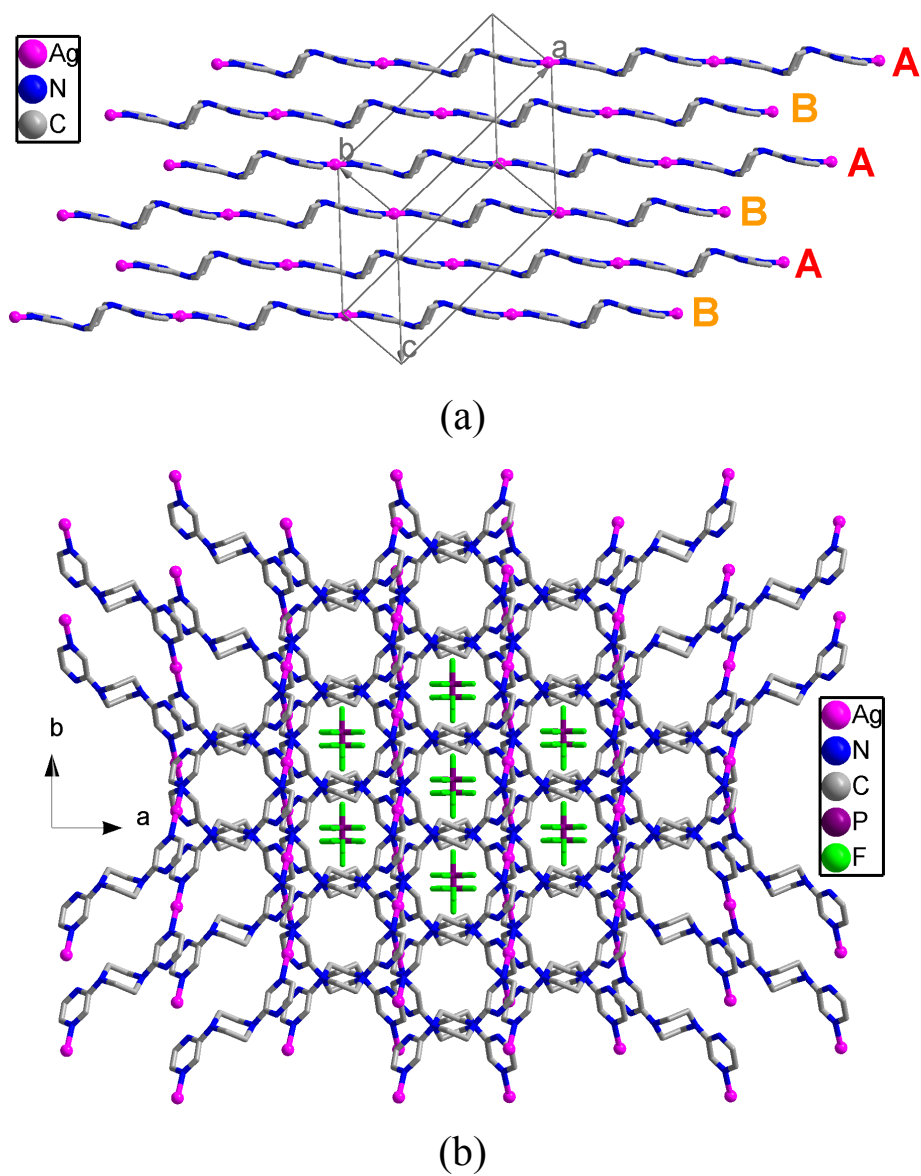

**Fig. S8** (a) Perspective view of the 1D chain structures of **1**, showing the arrangement in an ABAB order. (b) Packing diagrams of **1** viewed along the crystallographic *c*-axis. Hydrogen atoms are omitted for clarity.

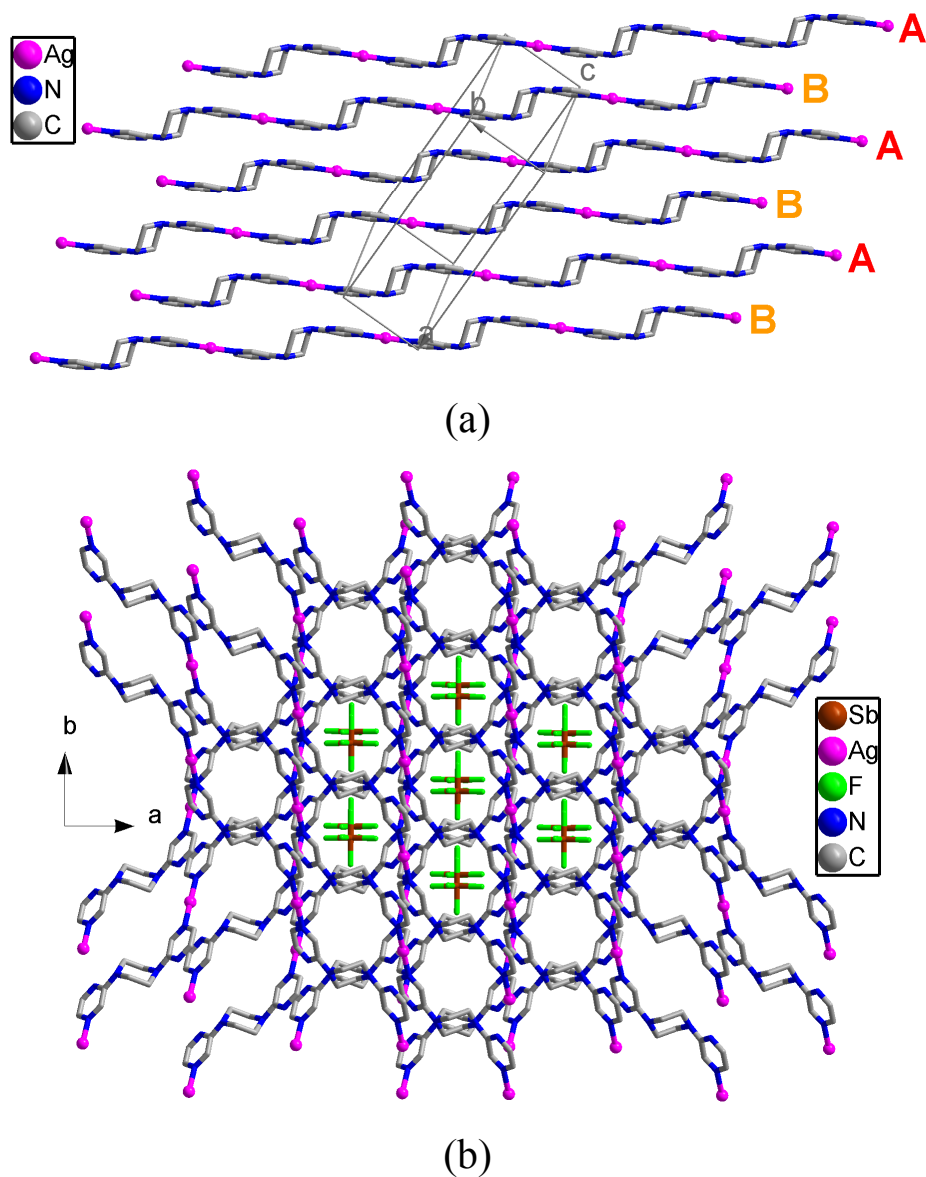

**Fig. S9** (a) Perspective view of the 1D chain structures of **2**, showing the arrangement in an ABAB order. (b) Packing diagrams of **2** viewed along the crystallographic *c*-axis. Hydrogen atoms are omitted for clarity.

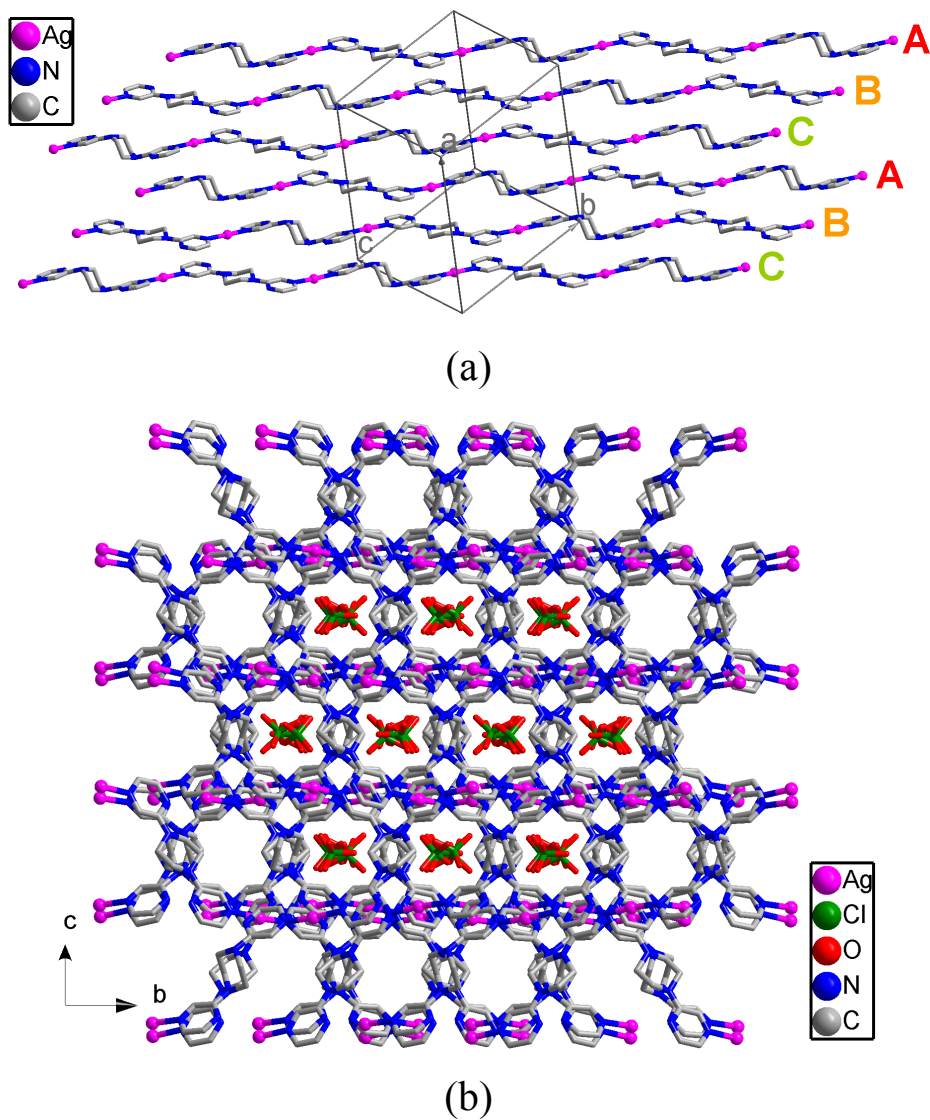

**Fig. S10** (a) Perspective view of the 1D chain structures of **3**, showing the arrangement in an ABCABC order. (b) Packing diagrams of **3** viewed along the crystallographic  $a$ -axis. Hydrogen atoms are omitted for clarity.

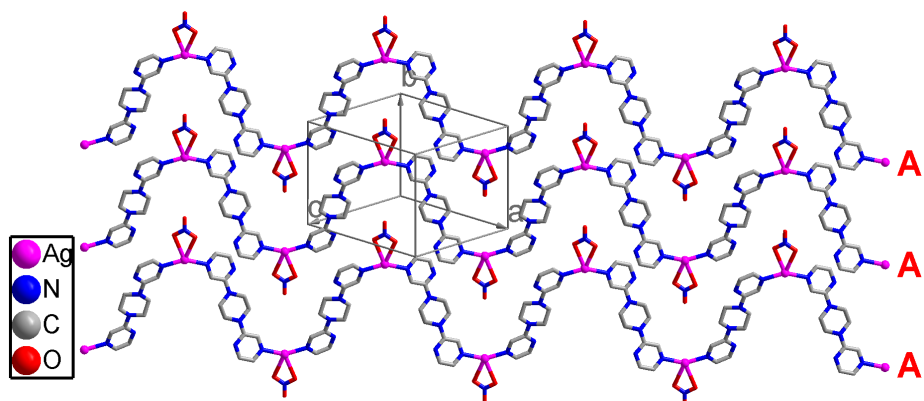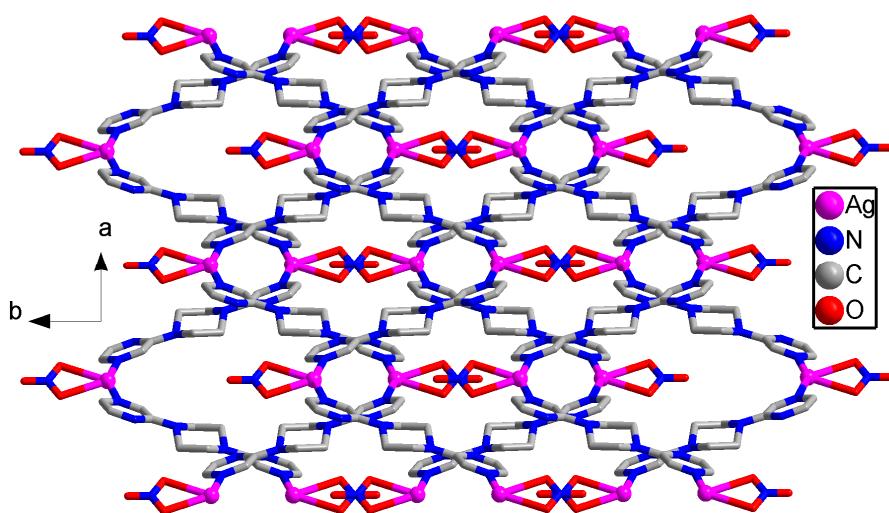

**Fig. S11** (a) Perspective view of the 1D chain structures of **4**, showing the arrangement in an AAA order. (b) Packing diagrams of **4** viewed along the crystallographic *c*-axis. Hydrogen atoms are omitted for clarity.
